# Supplementary material
Source: PubMed Central journal article supplement (PMC3143560)
Supplement: supp_dev.067942_DEV067942TableS2.pdf [file supp_dev.067942_DEV067942TableS2.pdf]

**Table S2. Analysis of *nclb* mutant clones in the female germline and follicle cells**

|            |                          | Day 2 (n)  | Day 5 (n)  | Day 10 (n)  | Day 15 (n) |
|------------|--------------------------|------------|------------|-------------|------------|
| GSC clones | Control                  | nd*        | 21.3% (80) | 14.4% (118) | 8.9 % (80) |
|            | <i>nclb</i> <sup>2</sup> | nd*        | 30% (80)   | 14.3% (105) | 12.9% (70) |
| GC clones  | Control                  | 17.3% (81) | 50% (80)   | 23.7% (118) | 25% (80)   |
|            | <i>nclb</i> <sup>2</sup> | 20.6 (97)  | 52.5% (80) | 29.5% (105) | 25.7% (70) |
| FC clones  | Control                  | 47.2% (53) | 74.2% (66) | 53.1% (64)  | 20.3% (59) |
|            | <i>nclb</i> <sup>2</sup> | 42.9% (56) | 69% (71)   | 10.9% (64)  | 7.8% (38)  |

Table shows the percentage of ovaries with GSC, GC and FC clones.

\*The clonal marking system used did not allow identification of GSC clones at this early stage.
