# Supplementary material
Source: PubMed Central journal article supplement (PMC3143560)

A

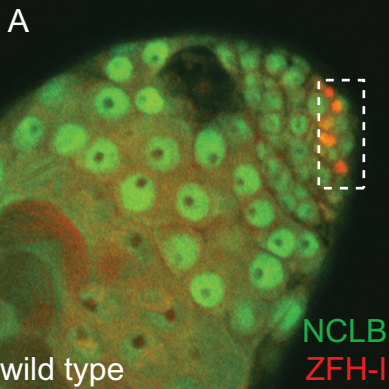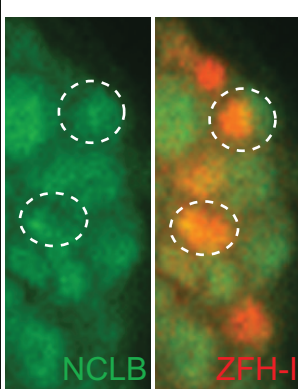

B

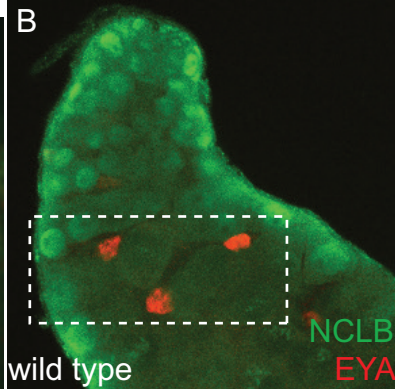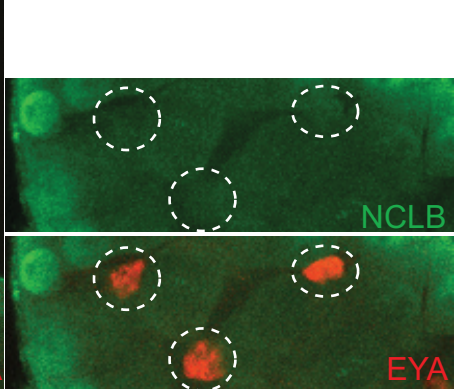

Supplement: supp_dev.067942_DEV067942FigS3.pdf [file supp_dev.067942_DEV067942FigS3.pdf]
